# Supplementary material for: Mycobacterium tuberculosis resistance prediction and lineage classification from genome sequencing: comparison of automated analysis tools
Source: PubMed Central journal article supplement (PMC7365310; doi:10.1038/srep46327), 2017-04-20

***Mycobacterium tuberculosis* resistance prediction and lineage classification  
from genome sequencing: comparison of automated analysis tools**

Viola Schleusener<sup>1</sup>, Claudio U. Köser<sup>2</sup>, Patrick Beckert<sup>1,3</sup>, Stefan Niemann<sup>1,3\*</sup>, and Silke  
Feuerriegel<sup>1,3\*</sup>

<sup>1</sup> Division of Molecular and Experimental Mycobacteriology Group, Research Center Borstel,  
Borstel, Germany

<sup>2</sup> Department of Medicine, University of Cambridge, Cambridge, United Kingdom

<sup>3</sup> German Center for Infection Research, Borstel Site, Borstel, Germany

Corresponding author: Stefan Niemann, Division of Molecular and Experimental  
Mycobacteriology Group, Research Center Borstel, Borstel, Germany. Tel: 0049-4537-  
1887620, E-Mail: [sniemann@fz-borstel.de](mailto:sniemann@fz-borstel.de)

\*SN and SF contributed equally to this work

### Supplementary Figure S1.

Mapping results (stampy) for Mykrobe Predictor TB's low-frequency variants in *rpoB* (n=7) and *katG* (n=1)

IGV mapping of 1327-04 at genome position 2155168

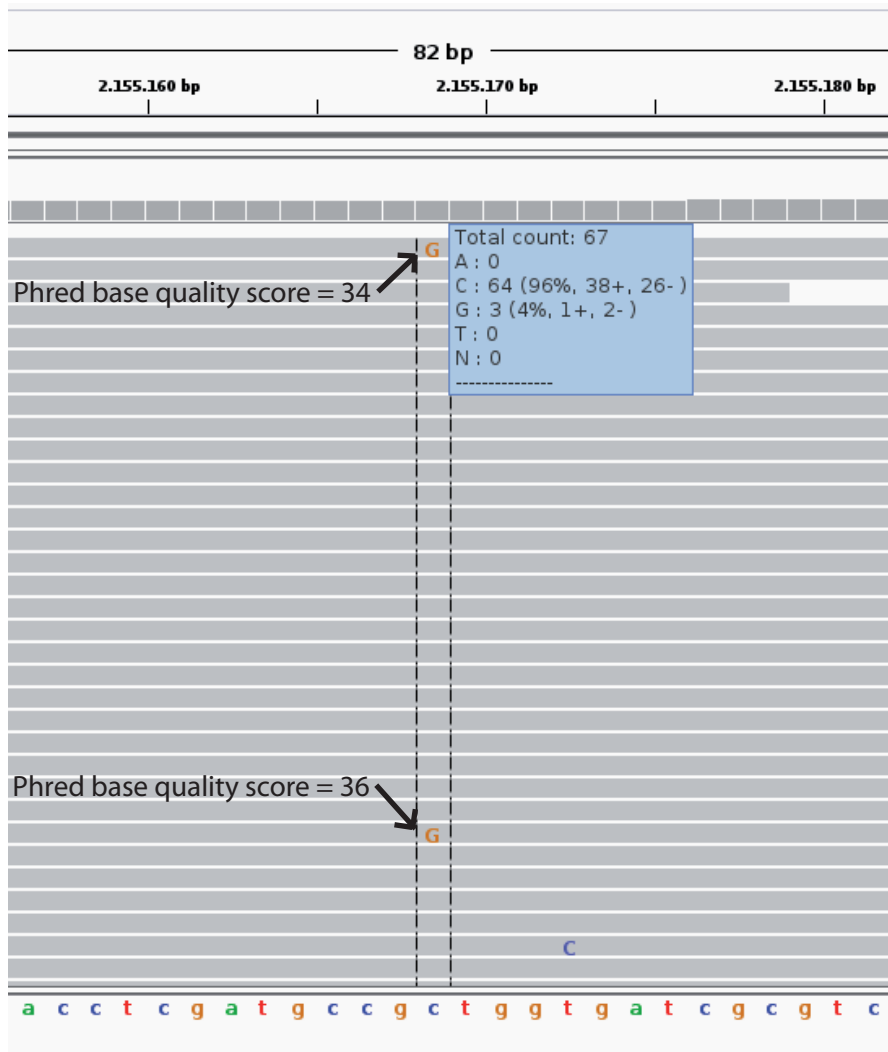

# IGV mapping of 3158-04 at genome position 761154

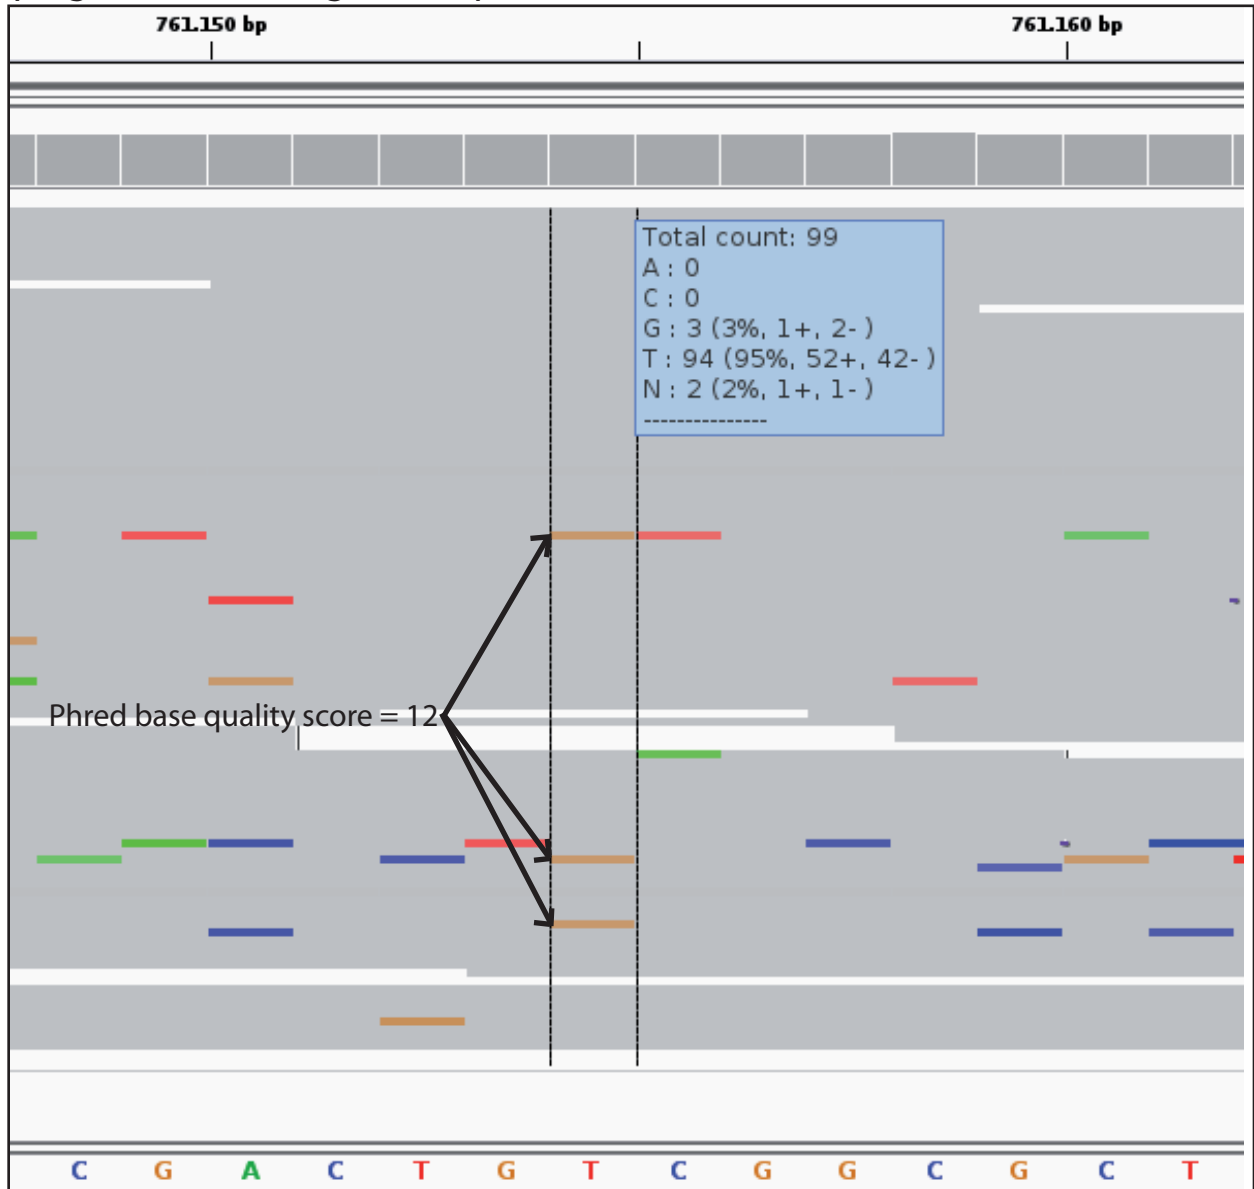

IGV mapping of 4712-04 at genome position 761079

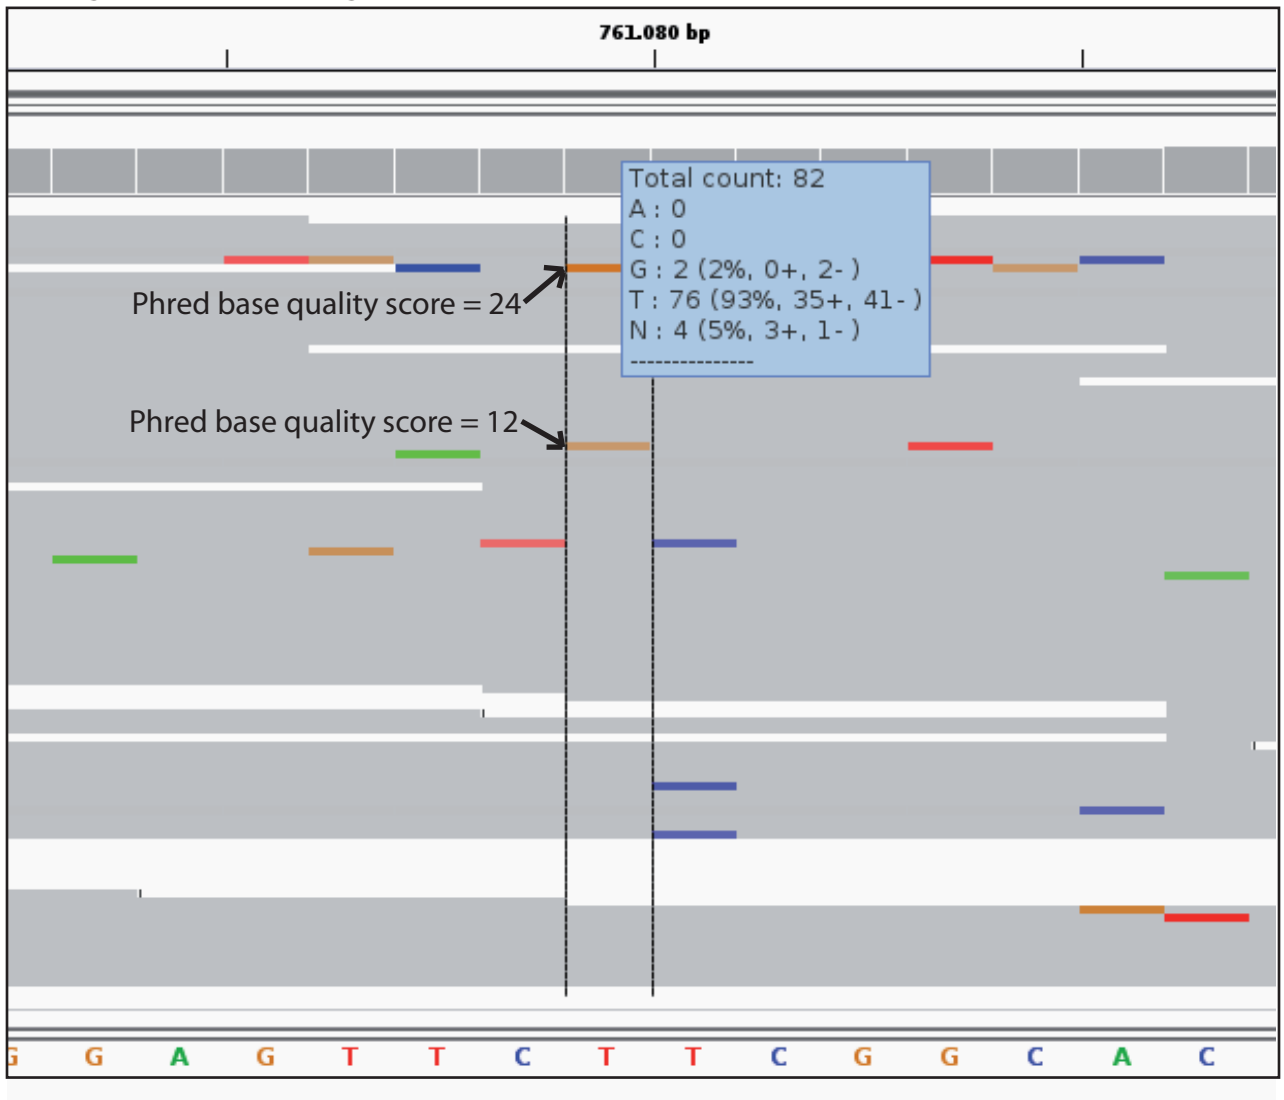

IGV mapping of 4717-04 at genome position 761139

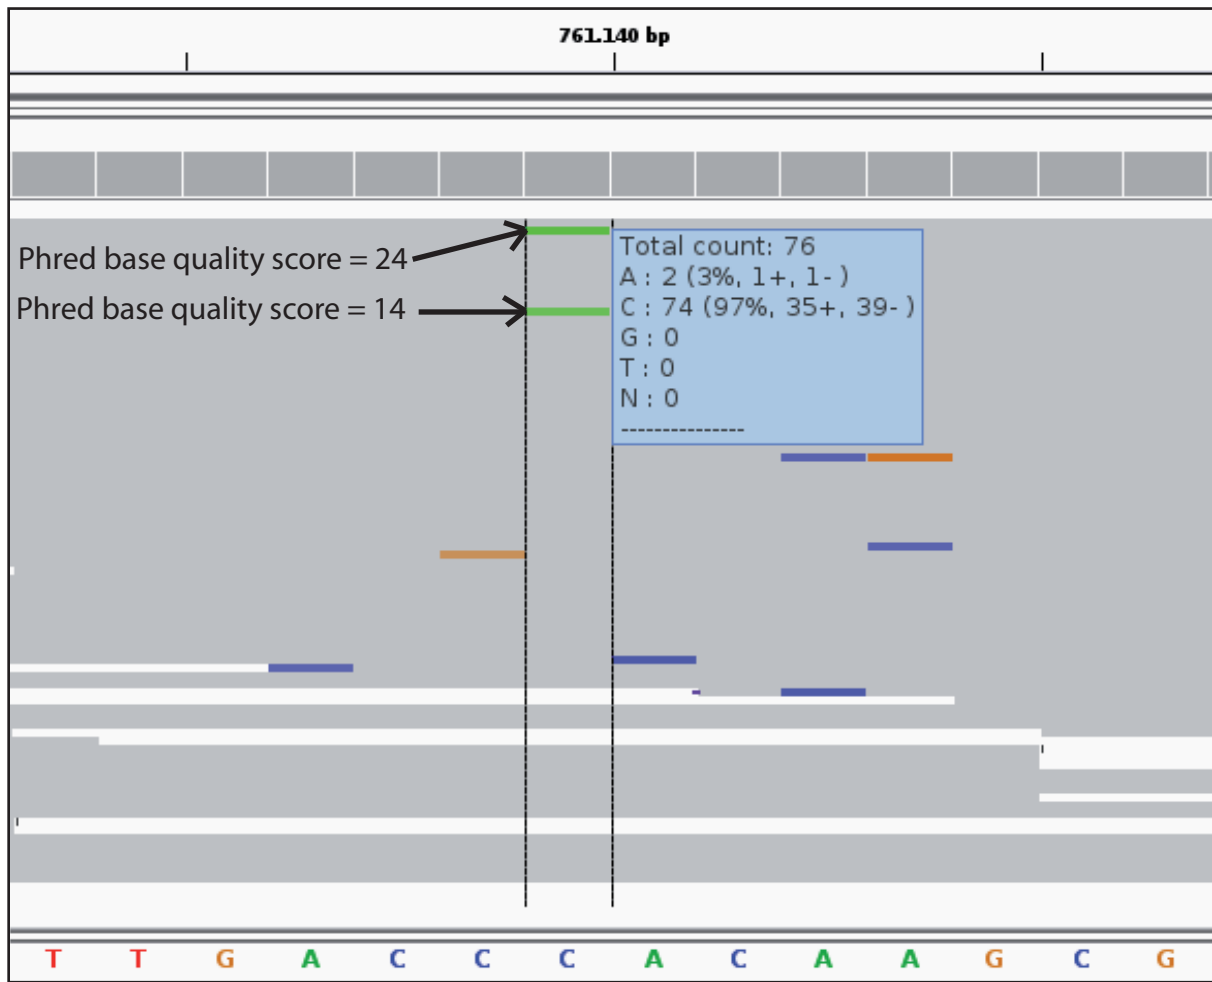

IGV mapping of 6640-04 at genome position 761154

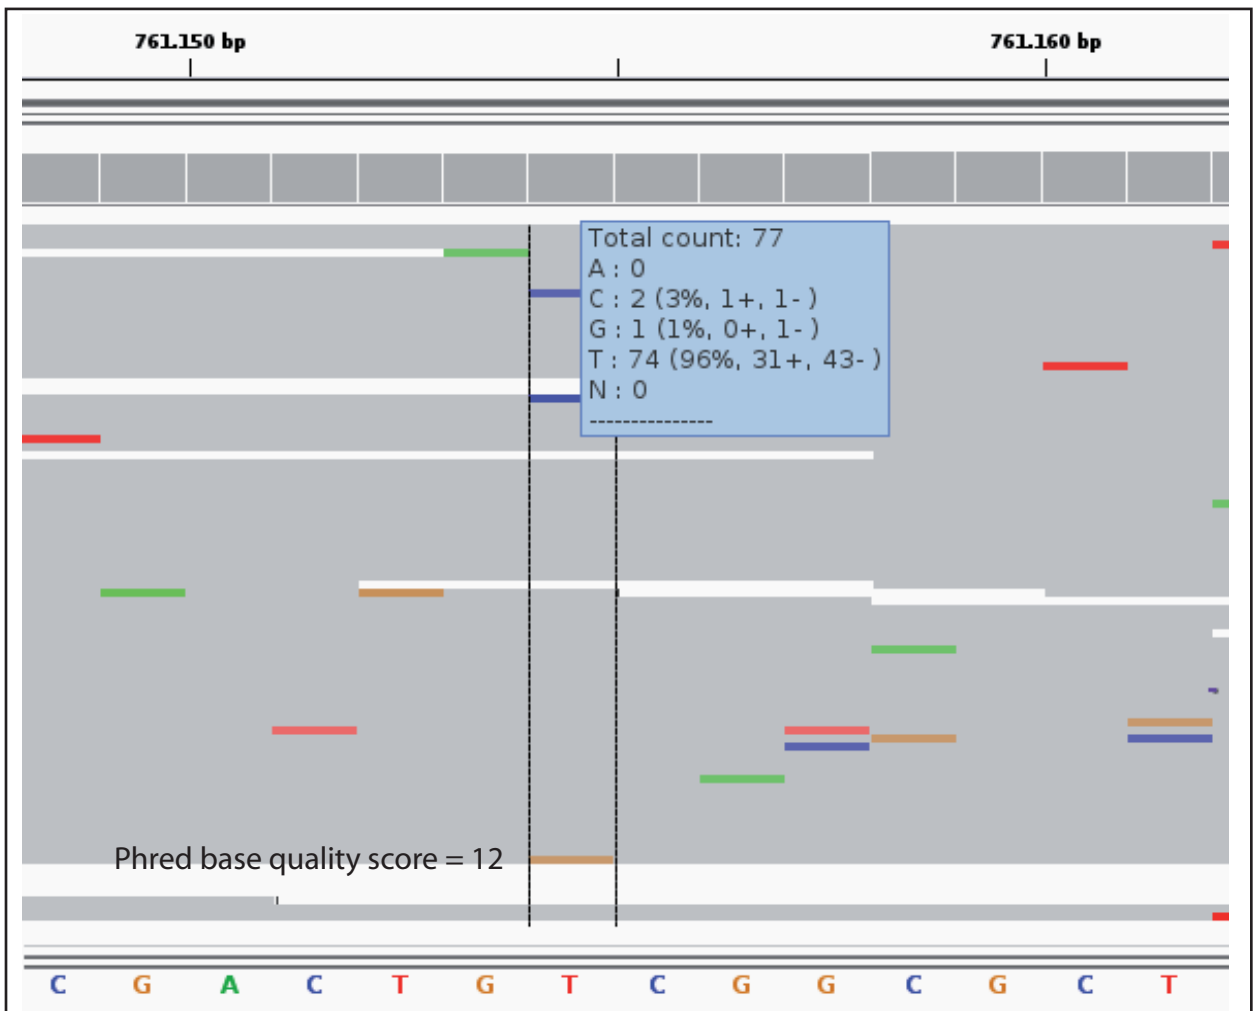

IGV mapping of 8082-03 at genome position 761133

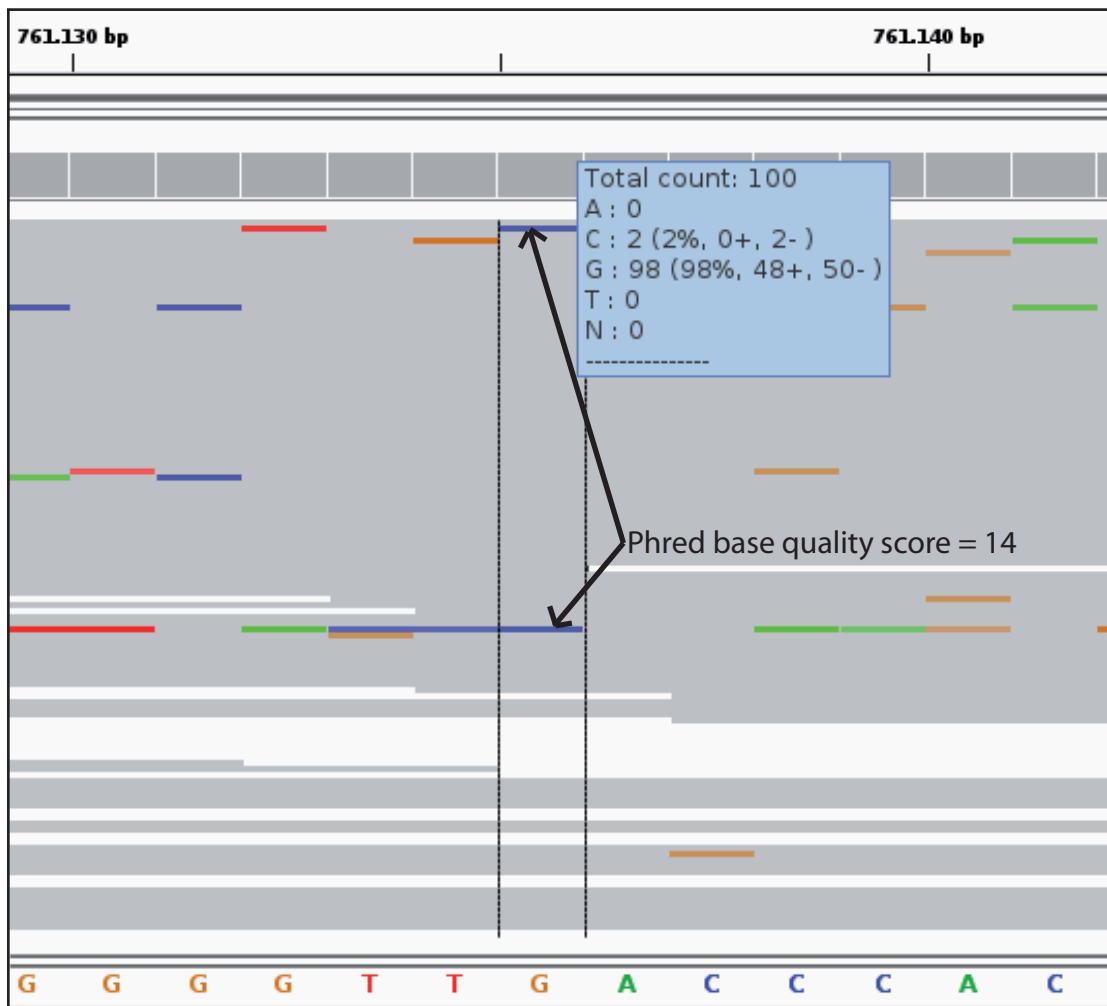

# IGV mapping of 10205-03 at genome position 761133

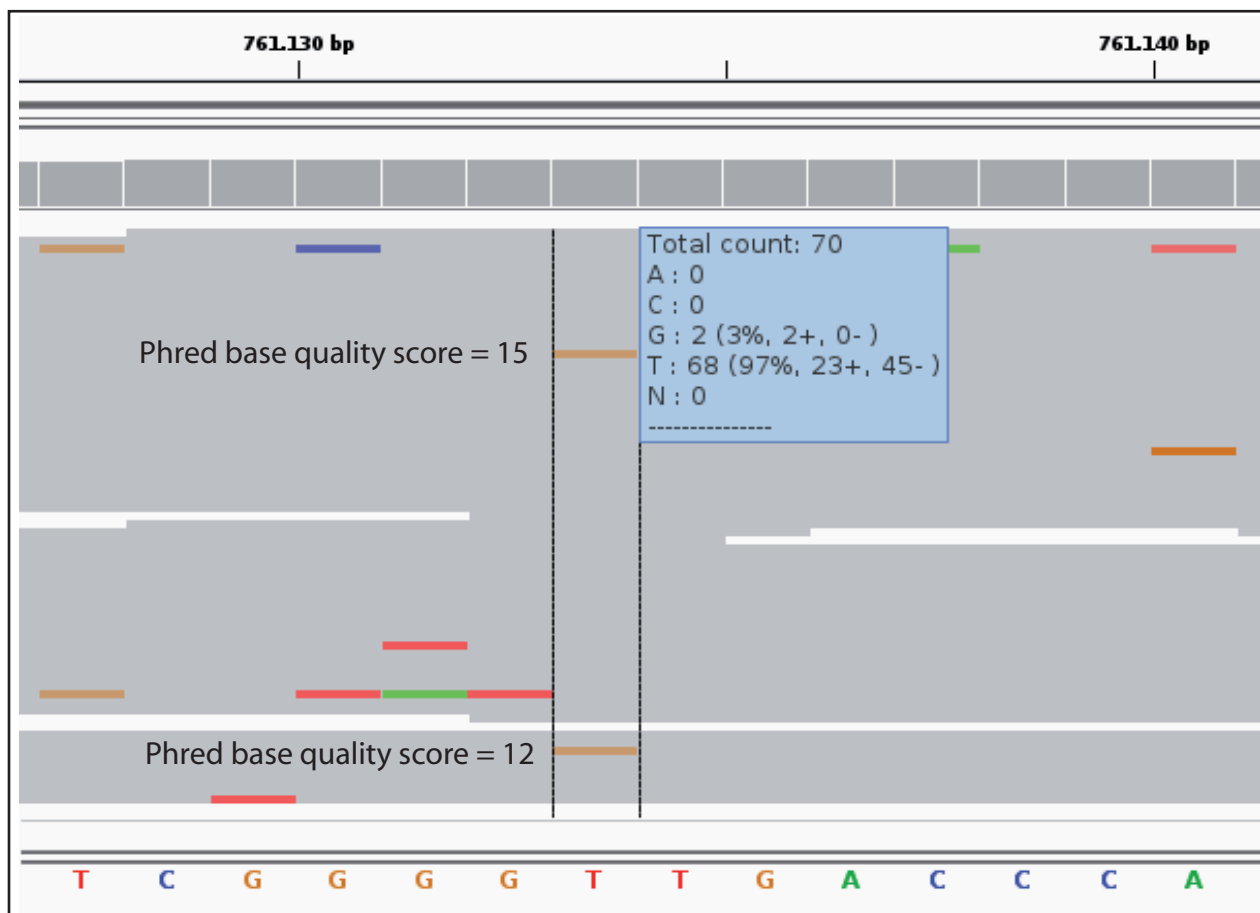



IGV mapping of 11818-03 at genome position 761108

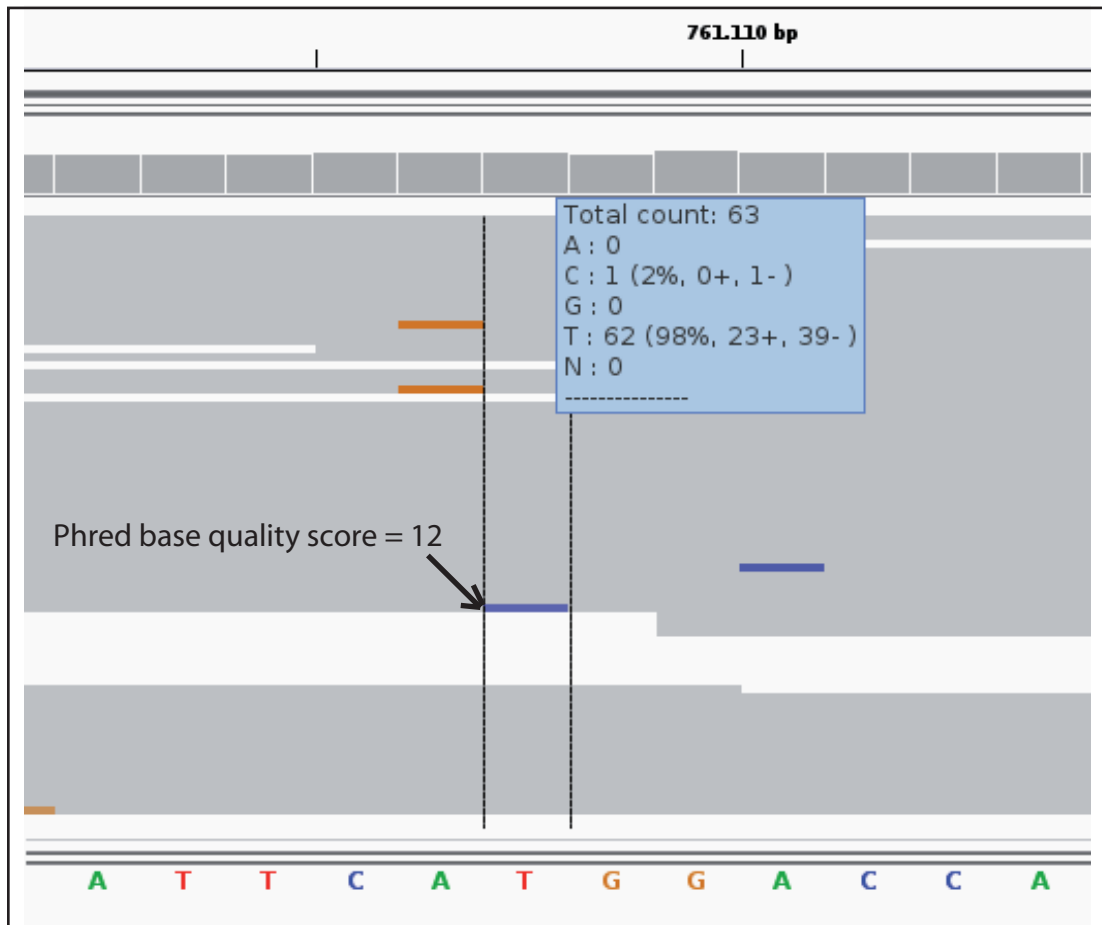

Supplement: 41598_2017_BFsrep46327_MOESM18_ESM.pdf [file 41598_2017_BFsrep46327_MOESM18_ESM.pdf]
